1

2

3 Cryopreservation of *Hydractinia symbiolongicarpus* sperm to support community-  
4 based repository development for preservation of genetic resources

5

6 Aidan L. Huene<sup>1,2</sup>, Matthew L. Nicotra<sup>1,2,3\*</sup>, Virginia M. Weis<sup>4</sup>, Terrence R. Tiersch<sup>5\*</sup>

7

8 <sup>1</sup> Department of Surgery, Thomas E. Starzl Transplantation Institute, University of Pittsburgh,  
9 Pittsburgh, PA, USA

10 <sup>2</sup> Pittsburgh Center for Evolutionary Biology and Medicine, University of Pittsburgh, Pittsburgh,  
11 PA, USA

12 <sup>3</sup> Department of Immunology, University of Pittsburgh, Pittsburgh, PA, USA

13 <sup>4</sup> Department of Integrative Biology, Oregon State University, Corvallis, OR, USA

14 <sup>5</sup> Aquatic Germplasm and Genetic Resources Center, School of Renewable Natural Resources,  
15 Louisiana State University Agricultural Center, Baton Rouge, LA, USA

16

17 \* Corresponding authors

18 Email:

19 [TTiersch@agcenter.lsu.edu](mailto:TTiersch@agcenter.lsu.edu) (TT)

20 [matthew.nicotra@pitt.edu](mailto:matthew.nicotra@pitt.edu) (MN)

## 21 **Abstract**

22 *Hydractinia symbiolongicarpus* is an emerging model organism in which cutting-edge genomic  
23 tools and resources are being developed for use in a growing number of research fields.  
24 However, one limitation of this model system is the lack of long-term storage for genetic  
25 resources. Our goal in this study was to establish a generalizable approach to sperm  
26 cryopreservation that would support future repository development and could be applied to  
27 many species according to available resources. Our approach was to: 1) Assess sperm  
28 characteristics and standardize collection and processing; 2) Assess acute toxicity to  
29 cryoprotectants, and 3) Evaluate and refine freezing conditions to permit post-thaw fertilization  
30 and produce viable offspring. By following this approach, we found that *Hydractinia* sperm  
31 incubated in 5% DMSO, equilibrated at 4°C for 20 min, and cooled at a rate of 20°C/min to -  
32 80°C at a cell concentration of 10<sup>8</sup>-10<sup>9</sup>/mL in 0.25-mL aliquots were able to fertilize 150-300  
33 eggs which yielded offspring that could metamorphose into juvenile polyps. In addition,  
34 improvements were made for processing sperm using a customized 3-D printed collection  
35 system. Other opportunities for improvement include optimizing the volumetric sperm-to-egg  
36 ratio for fertilization. Establishing repository capabilities for the *Hydractinia* research  
37 community will be essential for future development, maintenance, protection, and distribution  
38 of genetic resources. More broadly, this application-based approach highlights the long-term  
39 value of establishing repository-level resources that can be expanded to fit community needs.

## 40 Introduction

41 *Hydractinia symbiolongicarpus* is a colonial cnidarian and an established model for  
42 evolutionary developmental biology, stem cell biology, regeneration, and allorecognition [1–3].  
43 In recent years, efforts to improve *Hydractinia* as a model system have included generation of  
44 robust laboratory strains for use by the research community, sequencing of these strains  
45 through the *Hydractinia* Genome Project (<https://research.nhgri.nih.gov/hydractinia/>), and  
46 establishment of methods to produce transgenic animals via the random integration of  
47 exogenous DNA [4] or targeted integration via CRISPR/Cas9-mediated gene knock-in [5].

48 An increasing limitation to the expanded use of *Hydractinia* as a model is the lack of  
49 long-term storage options for genetic resources. Over the years, laboratories have collected  
50 and bred hundreds of genotypically distinct colonies, while simultaneously generating strains  
51 bearing various transgenes. In all cases, these animals have had to be maintained as live  
52 animals or they would be lost. While this is possible because *Hydractinia* colonies can be  
53 maintained for decades under laboratory conditions, it is increasingly costly in terms of labor  
54 and space. These costs are often minimized by reducing colonies to the smallest possible size,  
55 and only expanding them via clonal reproduction when needed for experiments. However,  
56 these colonies remain vulnerable to accidents, disease, and improper handling which can result  
57 in death and permanent loss of genotypes important to previous and future research.

58 To address this limitation, we sought to evaluate the feasibility and potential utility of  
59 cryopreservation as an archival storage method. As an immediate benefit, cryopreservation  
60 would allow “backing-up” animals that are valuable genetic resources. And, as a long-term

61 benefit beyond laboratory use, cryopreserved stocks would allow user groups from across the  
62 research community to store and access samples on demand rather than requiring time and  
63 resources to grow or collect new animals. While the ultimate goal would be cryopreservation of  
64 germplasm and somatic tissues from all life stages, here we focused on *Hydractinia* sperm as  
65 the most amenable to cryopreservation based on previous success in corals [6], and the  
66 anemone *Nematostella* (Matt Gibson and Shane Merryman, personal communication).

67         Although much is known about *Hydractinia* embryonic development and the  
68 differentiation of *Hydractinia* germ cells [7–9], much less is known about *Hydractinia*  
69 germplasm after its release, beyond what is necessary for routine breeding. It is well  
70 established that *Hydractinia* are dioecious and have gonozooids (reproductive polyps) that bear  
71 multiple gonophores (gamete-filled structures) that release either sperm or eggs. Healthy  
72 *Hydractinia* release gametes daily. Researchers typically allow male and female colonies to  
73 spawn together in the same water or they collect eggs and sperm separately, then mix them  
74 within 30 minutes. Anecdotal evidence suggests waiting longer than 30 minutes decreases the  
75 quantity and quality of embryos.

76         After fertilization, each embryo develops into planula larva (1-4 d) before permanently  
77 attaching to the surface and metamorphosing into a juvenile primary polyp. The animal then  
78 grows by extending structures called stolons across the surface, from which additional polyps  
79 are produced to create a colony. Colonies become sexually mature within 1-2 months. Under  
80 laboratory conditions the number of offspring that are male or female is consistent with a 1:1  
81 sex ratio.

82           Successful cryopreservation of sperm cells requires the balance of multiple parameters  
83 [10]. These include the storage temperature and the time that elapses the time and storage  
84 temperature that elapses between sperm collection and freezing, sperm concentration at the  
85 time of freezing, choice and concentration of cryoprotectant, cooling method and rate, thawing  
86 method and rate, and the conditions under which thawed sperm will be used for fertilization  
87 [11]. Here we detail a systematic three-part approach to: 1) determine basic characteristics of  
88 *Hydractinia* sperm and standardize collection and processing; 2) test the toxicity of commonly  
89 used cryoprotectants, and 3) identify conditions that maximized the likelihood of cryopreserved  
90 sperm samples being capable of fertilization after thawing.

## 91 **Materials and methods**

### 92 **Ethics**

93           Animal care is overseen by separate Institutional Animal Care and Use Committees at  
94 the University of Pittsburgh and Louisiana State University. *Hydractinia symbiolongicarpus* is a  
95 marine invertebrate lacking a central nervous system and is not regulated by specialized  
96 guidelines. All animals used in this study were maintained in continuous culture as detailed  
97 below.

### 98 **Animal care and breeding**

99           Experimental work was performed from February to April, 2019, at the Aquatic  
100 Germplasm & Genetic Resources Center (AGGRC) in Baton Rouge with animals transported in  
101 50-mL tubes by overnight shipping from University of Pittsburgh. Colonies were maintained and

102 grown as previously described [5] and cultured for at least 2 weeks before use in experiments.  
103 Briefly, colonies were established on 25 mm x 75 mm glass microscope slides and cultured in  
104 38-L (10-gal) aquaria using artificial seawater (ASW) (Instant Ocean Reef Crystals, Spectrum  
105 Brands, Blacksburg, VA) at between 29 and 31 ppt, held at 22-23°C, and maintained on an  
106 8h:16h (light:dark) photoperiod. Adult colonies were fed 4-day-old *Artemia* nauplii on Monday,  
107 Wednesday, and Friday. On Tuesday and Thursday, colonies were fed a suspension of pureed  
108 oysters (fresh caught, shucked, pureed, aliquoted, flash frozen in liquid nitrogen, and stored at  
109 -20°C).

110 In this study, we performed crosses between two half siblings, a male (colony 291-10)  
111 and a female (colony 295-8) (Fig S1). Following first exposure to light, male and female colonies  
112 were moved into separate bins filled with ASW and placed under supplemental lighting.  
113 Gametes released approximately 1 hr after light exposure. Sperm were released in “clouds” or  
114 “streams” from individual gonophores (**Error! Reference source not found.A-C**) and were  
115 collected and pooled using a Pasteur pipette (**Error! Reference source not found.D**).

116 **Fig 1. Time lapse of sperm release.**

117 (A) Close-up view of *Hydractinia* polyps just prior to sperm release. Arrows  
118 indicate polyp types. (B) Arrowhead points to sperm stream being released. (C)  
119 Arrowheads point to sperm stream (polyps have retracted from B). (D) Top-down  
120 view of slide with *Hydractinia* releasing sperm. Arrowheads point to multiple  
121 streams of sperm released from the colony. (E) 1-d old larvae. (F) 2-d old larvae.

122 Eggs were collected by straining the water from the female bin with a 20- $\mu$ m cell  
123 strainer. For routine breeding and to serve as a positive control for fertilization, 20-30 clouds of

124 sperm were collected from 10 male slides, transferred to a 50-mL conical tube, and brought to  
125 a final volume of 15 mL with filtered sea water (FSW, artificial seawater filtered through 0.45  
126  $\mu\text{m}$  Polyethersulfone (PES) membrane Rapid-Flow Sterile Disposable Bottle Top Filters, Thermo  
127 Scientific Nalgene, catalog #295-4545). To this were added 400-600 eggs harvested from 8-9  
128 female slides. The final volume was brought to 30 mL with FSW and transferred to a 100-mm  
129 polystyrene Petri dish. Within 1 hr, embryos began to cleave and developed into planulae by  
130 the following day (**Error! Reference source not found.**E). On day 4 after fertilization, larvae (Fig  
131 1F) were settled by exposure to 100 mM Cesium Chloride (CsCl diluted in FSW) for 4-5 hr until  
132 ready for settlement, and were pipetted onto microscope slides and kept in the dark for 1-2 d  
133 or until attachment and primary polyps formed.

## 134 **Estimation of sperm concentration and motility**

135 On six separate days, individual sperm clouds (cumulative N = 35) were collected in a 10-  
136  $\mu\text{L}$  volume and analyzed for motility within 20 min of collection. The sample was briefly  
137 vortexed to form a uniform suspension, loaded onto a Makler<sup>®</sup> counting chamber (SEFI Medical  
138 Instruments Ltd, Irvine Scientific, Santa Ana, CA, USA), and viewed with dark-field illumination  
139 at 200-X magnification (Olympus CX41RF, Tokyo, Japan). Sperm were already motile when  
140 observed and did not require activation. The sample concentration was counted twice  
141 according to an established protocol [12] and the average used as the sperm concentration (at  
142  $10^6/\text{mL}$ ). Motility was quantified using a computer-assisted sperm analysis (CASA) system  
143 (CEROS model; Hamilton Thorne, Inc., Beverly, MA, USA). The settings used were based on a  
144 previous study [13]. Briefly, motility and VCL (curvilinear velocity) were measured for 10 sec.

145 Cell detection was set at a minimum of 25 pixels for contrast and 6 pixels for cell size. In each  
146 measurement, 100 frames were captured at a rate of 60 frames/sec. Sperm with an average of  
147  $>20 \mu\text{m/s}$  measured path velocity (VAP) were counted by the program as being progressively  
148 motile. GraphPad Prism (v8.2.0) was used to calculate correlations between sperm  
149 characteristics (velocity, percent motile, and concentration).

## 150 **Longevity and temperature sensitivity of sperm**

151 To test the effects of time and temperature on sperm motility, approximately 30 sperm  
152 clouds were collected using a 10- $\mu\text{L}$  pipette, pooled and diluted to produce a concentration of 2  
153  $\times 10^7$  cells/mL, and then divided into two tubes. One tube was kept at room temperature (21-  
154  $23^\circ\text{C}$ ) and the other was kept in a  $4^\circ\text{C}$  refrigerator. Each treatment was evaluated hourly for  
155 presence or absence of motility for 7 hr.

## 156 **Fertility of sperm**

157 To determine how long sperm could produce viable offspring when stored at  $4^\circ\text{C}$ , we  
158 performed a time-series experiment using a single collection of sperm. Approximately 150  
159 clouds of sperm were collected using a Pasteur pipette and stored in a 50-mL conical tube.  
160 Concentration was determined as described above. On day 0, 3 mL of this sample (total of  $2 \times$   
161  $10^7$  sperm) were used to fertilize 200 eggs in a total volume of 30 mL FSW. The sperm sample  
162 was stored at  $4^\circ\text{C}$ . On subsequent days, freshly collected eggs were fertilized with 3 mL ( $2 \times 10^7$   
163 sperm) of sperm in 30 mL FSW. Offspring were followed until they metamorphosed into  
164 juvenile polyps.



## 165 **Acute Toxicity of Cryoprotectants**

166           Approximately 20 sperm clouds were collected using a 10- $\mu$ L pipette, pooled, and  
167 adjusted to a concentration of  $1 \times 10^7$  sperm/mL using FSW. Three cryoprotectants, methanol  
168 (Fisher Scientific, Waltham, MA) dimethyl sulfoxide (DMSO, Fisher Scientific, Waltham, MA),  
169 and glycerol (Sigma-Aldrich, St. Louis, MO) were used. For each cryoprotectant, double strength  
170 stocks of 10%, 20%, and 30% (v/v) were created using FSW. The sperm and double-strength  
171 cryoprotectant were mixed in equal volumes (100  $\mu$ L:100  $\mu$ L) resulting in a final sperm  
172 concentration of  $5 \times 10^6$  sperm/mL and final cryoprotectant concentrations of 5%, 10%, or 15%.  
173 Sperm were evaluated at 30 min after addition of cryoprotectant (30 min was chosen as a  
174 practical total exposure time required for cryoprotectant equilibration and for packaging and  
175 handling of the samples). Presence or absence of motility was used as an estimate for toxicity.

## 176 **Standardized Sperm Collection (3-D printing)**

177           Based on the difficulties and inefficiencies experienced during pilot experiments working  
178 with *Hydractinia* sperm, we designed a custom sperm collection chamber with integrated slide  
179 rack to collect and concentrate sperm for downstream applications (Fig 2) by use of free  
180 computer-aided design (CAD) online software (Tinkercad, version 4.7, Autodesk, San Rafael,  
181 CA). The design was exported as a stereolithography (STL) file and imported into a 3-D printer  
182 slicer software (Simplify3D, version 4.0, Cincinnati, OH) to control the printing process (Table  
183 S1). Collection chambers were printed in black PLA (ZYLtech Engineering, Spring, TX) filament  
184 on a stock Prusa i3 MK3 3-D printer (Prusa Research, Czech Republic) (Table S2).

185                   **Fig 2. Sperm collection chamber.**  
186                   (A) CAD-rendering of the 3-D design. (B) Printed model with rack and box  
187                   separate. (C) Printed model with rack inserted. Object model deposited on  
188                   Thingiverse. <https://www.thingiverse.com/thing:3661286>

189

## 190 **Freezing**

191                   To collect sperm for freezing, we placed nine slides of males in the 3-D printed sperm  
192                   collection chamber filled with ASW. An additional male was placed in a separate bin so that  
193                   sperm could be collected and used as a fertilization positive control. After sperm were released,  
194                   the slide rack was removed from the sperm collection chamber, the cloudy seawater poured  
195                   into two 50-mL conical tubes (~80 mL total) and spun for 20 min at 3,000 rpm (~1450-1500 x *g*)  
196                   which resulted in a visible white pellet. The supernatant was pipetted off and the pellets were  
197                   combined and resuspended in FSW to the appropriate concentrations (between  $2 \times 10^6$  and  $2 \times$   
198                    $10^9$  sperm/mL) and stored at 4°C until they were prepared for freezing (~3 hr).

199                   To prepare for freezing, sperm were mixed with an equal volume of 10% DMSO or 10%  
200                   methanol in FSW (final concentrations of 5% cryoprotectant), drawn into 0.25-mL French straws  
201                   (IMV International, MN, USA), and held at 4°C in a controlled-rate freezer for the remaining  
202                   equilibration time (Minitube of America, IceCube 14M, SY-LAB). The total equilibration time,  
203                   from initial mixing with cryoprotectant to starting the freezing program, was set at 20 min.  
204                   Equilibrated samples were cooled to -80°C with one of three pre-programmed cooling rates:

205 5°C/min, 20°C/min, or 30°C/min. Frozen samples were held at -80°C for at least 5 min before  
206 transfer and storage in liquid nitrogen.

## 207 **Thawing and use for fertilization**

208 After 21-69 hr of storage, straws were removed from liquid nitrogen and immediately  
209 plunged into room temperature (22°C) water for 8 sec. The straws were clipped and a 2- $\mu$ L  
210 sample was removed, diluted with 38  $\mu$ L of FSW (1:20 dilution), and used for sperm  
211 assessment. The remaining sample was held in a microfuge tube until fresh eggs were obtained  
212 (15-30 min). After performing the fertilization positive control (routine breeding), 100-300 fresh  
213 eggs were collected in 500  $\mu$ L of FSW and added to the microfuge tube with the thawed sperm.  
214 The mixed gametes were placed into a 100-mm Petri dish and ~50 mL FSW was added. An  
215 estimate of the number of eggs used was obtained by counting in groups of ten. The resulting  
216 fertilization was kept at room temperature and observed for 24 hr to determine how many  
217 planulae had begun forming. The resulting offspring were observed until metamorphosis into  
218 juvenile polyps.

## 219 **Results**

### 220 **Sperm motility and viability**

221 To assess sperm characteristics, we measured sperm from 35 clouds (each collected in  
222 10  $\mu$ l) using CASA. Mean velocity was  $50.8 \pm 26.2 \mu\text{m/s}$ , mean percent that were motile was  $37$   
223  $\pm 22\%$  and mean concentration was  $9.37 \pm 5.31 \times 10^6/\text{mL}$ . Based on linear regression, velocity  
224 and motility were correlated ( $R^2 = 0.2804$ ,  $P = 0.0011$ ) (Fig 3A), as were concentration and

225 motility ( $R^2 = 0.2870$ ,  $P = 0.0009$ ) (Fig 3B). Velocity and concentration were not correlated ( $R^2 =$   
226  $0.02365$ ,  $P = 0.3778$ ) (Fig 3C).

227 **Fig 3. Correlations among sperm velocity, motility, and concentration.**

228 Each point represents a sperm cloud ( $N = 35$ ). (A) Distribution of sperm based on  
229 velocity and the number motile. (B) Distribution of sperm based on  
230 concentration and number motile. (C) Distribution of sperm comparing velocity  
231 and concentration.

232 To determine the effect of temperature on sperm viability, we compared the motility of  
233 freshly collected sperm held at room temperature ( $22^\circ\text{C}$ ) to that of sperm held in a  $4^\circ\text{C}$   
234 refrigerator. At room temperature, the number of motile sperm declined over 6 hr, such that by  
235 7 hr only twitching was observed (tail movement without progressive motility). In contrast,  
236 sperm kept at  $4^\circ\text{C}$  retained progressive motility 7 hr after collection, although the total number  
237 of motile sperm and the velocity visibly decreased. By 23 hr, no sperm were motile, but  
238 approximately 40%, assessed manually were still twitching. Thus, holding sperm at  $4^\circ\text{C}$   
239 prolonged motility.

240 The observation that sperm held at  $4^\circ\text{C}$  were still moving after 23 hr raised the question  
241 of whether they could still fertilize eggs and, if so, whether sperm would remain viable after  
242 longer storage times. To address this question, we collected  $\sim 150$  sperm clouds and used the  
243 sperm to fertilize freshly collected eggs over the following 6 d (Fig 4). We performed daily  
244 routine breeding to serve as a positive control for egg fertilization; nearly all of the eggs ( $>95\%$ )  
245 were fertilized each day indicating that there was no appreciable differences in egg quality for

246 fertilization. On day 0, we mixed  $2 \times 10^7$  sperm (3 mL) with  $\sim 200$  eggs, which resulted in  $\sim 150$   
247 embryos. Because  $\sim 50$  eggs remained unfertilized, we interpreted this to indicate that the  
248 defined sperm number in this sample ( $2 \times 10^7$ ) were capable of fertilizing  $\sim 150$  eggs.

249 **Fig 4. Estimated sperm fertilization capacity over time.**

250 Each day,  $2 \times 10^7$  sperm cells from the same collection aliquot were used to  
251 fertilize the freshly collected eggs in 30 mL FSW. On Days 1 and 2, only  $\sim 100$  eggs  
252 were available for exposure to sperm. On the other days, a surplus of eggs were  
253 collected for exposure.

254 On each subsequent day, we mixed the same amount of stored sperm with as many  
255 eggs as we could collect and estimated the total number of fertilized and unfertilized embryos.  
256 We found that  $2 \times 10^7$  sperm consistently fertilized  $\sim 150$  eggs after 3, 5, and 6 d at  $4^\circ\text{C}$ . On days  
257 1 and 2, we were only able to collect  $\sim 95$  eggs, nearly all of which were fertilized. These latter  
258 data were consistent with the notion that  $2 \times 10^7$  sperm could fertilize  $\sim 150$  eggs. In these  
259 experiments, all embryos developed and metamorphosed into normal juvenile colonies. These  
260 results suggest that it is possible to store sperm for at least 6d at  $4^\circ\text{C}$  without an appreciable  
261 drop in fertilization capability, thereby enabling shipment of sperm samples. This also  
262 demonstrated that sperm motility is not necessarily a good predictor of fertilization success  
263 when gametes are mixed under controlled conditions.

264 **Determining cryoprotectant toxicity to sperm**

265 We tested the acute toxicity of three common cryoprotectants (DMSO, methanol, and  
266 glycerol). Sperm incubated with the three concentrations (5, 10 and 15%) of DMSO or

267 methanol displayed comparable motility after 30 min. In contrast, sperm exposed to 15%  
268 glycerol ceased moving immediately, while those exposed to 10% and 5% glycerol were non-  
269 motile within 30 min.

270 To determine whether cryoprotectant-treated sperm would be able to fertilize eggs, we  
271 exposed sperm to each cryoprotectant for 30 min and mixed  $4.1 \times 10^6$  sperm with 40 freshly  
272 collected eggs in a total volume of 50 mL. Sperm exposed to 10% or 15% of any cryoprotectant  
273 were unable to fertilize eggs. In contrast, sperm treated with 5% of any cryoprotectant yielded  
274 3-12 embryos (Fig 5). From this, we concluded that 5% DMSO or methanol would be suitable  
275 cryoprotectants.

276 **Fig 5. Number of fertilized eggs using cryoprotectant-treated sperm.**

277 For each condition, 30-40 eggs were exposed to  $4.1 \times 10^6$  sperm in a total  
278 volume of 50 mL.

## 279 **Identifying suitable freezing conditions**

280 While many factors affect the quality of cryopreserved sperm, three key parameters  
281 must be balanced: cryoprotectant concentration, sample concentration, and cooling rate. For  
282 example, higher cryoprotectant concentrations can be more toxic, whereas lower  
283 concentrations may not sufficiently protect the cells. Moreover, the toxicity of a given  
284 concentration of cryoprotectant often decreases as the sample concentration increases [10].  
285 The cooling rate must also be slow enough to allow cells to dehydrate sufficiently (to minimize  
286 intracellular ice formation), but fast enough to freeze them before concentrations of  
287 intracellular salts or pH (i.e., solution effects) or the cryoprotectant become damaging.

288 To survey the effects of freezing rate on sperm in either 5% DMSO or 5% methanol, we  
289 cooled sperm at 5°C/min and 30°C/min (Table 1, Experiment 1; Fig S2, S3). Samples were stored  
290 in liquid nitrogen for at least 21 hr before they were thawed and evaluated. In all conditions,  
291 the concentration of intact sperm in the thawed samples was reduced from  $1 \times 10^7$  to  $2 \times 10^6$  or  
292 fewer, nearly ten-fold, likely due to cell rupture either during freezing or thawing. Overall,  
293 between  $5 \times 10^4$  and  $1 \times 10^5$  fewer sperm were detected in the 30°C/min samples than in the  
294 5°C/min samples suggesting that the faster rate did not allow sufficient osmotic egress and  
295 intracellular ice was formed. We incubated aliquots of each thawed sample with 75 freshly  
296 collected eggs. Despite the low numbers of sperm used ( $\leq 5 \times 10^5$ ), at least one egg was  
297 fertilized in each condition. This indicated the presence of viable sperm and suggested that  
298 increasing the effective sperm concentration would increase fertilization.

299 **Table 1. Overview of frozen samples and fertilization potential.**

|                                        | Experiment 1    |                   |                 |                 | Experiment 2    |
|----------------------------------------|-----------------|-------------------|-----------------|-----------------|-----------------|
| Cryoprotectant                         | 5% DMSO         | 5% DMSO           | 5% Methanol     | 5% Methanol     | 5% DMSO         |
| Initial sperm concentration (sperm/mL) | $1 \times 10^7$ | $1 \times 10^7$   | $1 \times 10^7$ | $1 \times 10^7$ | $5 \times 10^7$ |
| Cooling rate (°C/min)                  | 5               | 30                | 5               | 30              | 20              |
| Hours stored frozen                    | 69              | 69                | 69              | 69              | 21              |
| Thawed sperm concentration (sperm/mL)  | $2 \times 10^6$ | $1.5 \times 10^6$ | $2 \times 10^6$ | $1 \times 10^6$ | $5 \times 10^7$ |

|                                       |                 |                   |                 |                   |                   |
|---------------------------------------|-----------------|-------------------|-----------------|-------------------|-------------------|
| <b>Total sperm mixed with 75 eggs</b> | $5 \times 10^5$ | $3.8 \times 10^5$ | $5 \times 10^5$ | $2.5 \times 10^5$ | $1.2 \times 10^7$ |
| <b>Number of embryos</b>              | 2               | 2                 | 2               | 1                 | 10                |

300

301 We increased the volume and concentration of sperm collected by fabricating a sperm  
302 collection chamber by 3-D printing that allowed incubation of as many as ten slides bearing  
303 male colonies in <100 mL of water, thus eliminating the need to collect sperm with pipettes.  
304 This enabled collection of  $10^9$  sperm per day (a 100-fold increase). We froze the sperm at a  
305 concentration of  $5 \times 10^7$ /mL at a cooling rate of  $20^\circ\text{C}/\text{min}$ . When thawed, these sperm samples  
306 remained at a concentration of  $5 \times 10^7$  sperm/mL (Table 1, Experiment 2; Fig S4). Moreover, the  
307 number of fertilized eggs increased to 10.

308 These results encouraged us to test whether we could further increase fertilization by  
309 increasing the concentration of sperm samples. We froze sperm at five different concentrations  
310 ranging from  $10^7$  to  $10^9$ /mL (Fig 6) at the  $20^\circ\text{C}/\text{min}$  cooling rate (Fig S5) and stored them in  
311 liquid nitrogen for 21 hr. The concentration of each sample post-thaw had the same count as  
312 before freezing. When thawed, sperm frozen at  $10^9$ /mL were able to fertilize 270-275 eggs.  
313 Sperm (in descending order of concentration) at  $5 \times 10^8$ /mL fertilized 235-250 eggs;  $1 \times 10^8$ /mL  
314 fertilized 150-250 eggs;  $5 \times 10^7$ /mL fertilized 26-150 eggs, and  $1 \times 10^7$ /mL fertilized 5-100 eggs.  
315 All embryos developed into larvae and were able to metamorphose into a primary polyp with  
316 no visual abnormalities. Thus, cooling sperm at a rate of  $20^\circ\text{C}/\text{min}$  and at concentrations in  
317 excess of  $1 \times 10^7$  showed best fertilization.



318 **Fig 6. Fertilization comparing frozen sperm.**

319 Each thawed sperm sample was exposed to different number of eggs. In each  
320 case, the number of eggs collected was manually estimated to be a surplus of  
321 what each respective sperm sample could fertilize based on their concentration.

322 **Discussion**

323 **Sperm motility and viability**

324 The sperm motility and concentration-related phenomena reported herein provide  
325 some insight of the basic characteristics of sperm clouds that have not been previously  
326 observed. While the results from this feasibility study are promising, there are several  
327 improvements and future experiments that can be pursued. There was a large standard  
328 deviation (<50%) in motility and concentration between individually collected sperm streams.  
329 Part of this variation reflects the imprecise manner traditionally used for collecting sperm as it  
330 is released. These findings reinforce the need to standardize collection methods and sperm  
331 concentrations. Future studies can also address other outstanding questions related to these  
332 characteristics. For example, when and how are sperm activated? Does the sperm  
333 concentration affect activation and motility? Determination of how these features could affect  
334 cryopreservation, especially among different genotypes, would be useful in expanding and  
335 making protocols more robust for *Hydractinia* and potentially other cnidarian models.

336 Concepts such as these have been studied quantitatively in aquatic species previously at  
337 the commercial scale, for example in blue catfish, *Ictalurus furcatus*, (for hatchery production of

338 hybrids) [14] by use of industrial engineering and simulation modeling approaches [15]. Those  
339 studies were based on use of automated high-throughput processing [16] developed using  
340 commercial dairy industry approaches [17] but are also relevant for processing at lower  
341 throughput. The emphasis in such approaches is on the application level for repository  
342 development, rather than on the research level for optimization of individual components (e.g.,  
343 cooling rate or cryoprotectant choice) for protocol development.

344         Another application-level concept often overlooked in traditional research approaches is  
345 the refrigerated storage of samples prior to freezing or use. Such storage enables shipping of  
346 germplasm for processing elsewhere, and can avoid waste by identifying the usable working  
347 lifetime of valuable material. We tested the retention of *Hydractinia* sperm fertility after  
348 storage in FSW at 4°C and found that freshly collected sperm and sperm stored for 6 d could  
349 fertilize comparable numbers of eggs. This result suggested that sperm could be stored in FSW  
350 at 4°C even longer and still produce viable embryos. Identifying these basic storage conditions  
351 is useful in cases when resources are not available to process on-site and samples must be  
352 transported to another facility for processing and storage.

353         Future studies should compare fertility across a range of storage temperatures with  
354 longer storage times when appropriate, and couple that with freezing experiments to evaluate  
355 the effects of storage on cryopreservation survival. In addition, extender solutions (e.g. buffers)  
356 can influence the quality and retention of fertility of sperm during storage [18–20]. Future  
357 studies should also address the total fertilization window for eggs. While mixing gametes  $\leq 30$   
358 mins post-release has been the community guideline for producing quality embryos, it has not

359 been determined quantitatively and it is possible that storage at a cooler temperature may  
360 extend fertility.

## 361 **Determining cryoprotectant toxicity to sperm**

362 The acute toxicity assay we performed was at a small scale, but yielded useful  
363 information regarding potential cryoprotectants. We initially observed limited fertilization using  
364 the treated sperm which demonstrated feasibility and a basis for improvement. In future  
365 studies, the potential effects of cryoprotectant toxicity on sperm and egg should be evaluated  
366 more clearly. If toxicity is affecting fertilization, sperm can be rinsed to reduce or eliminate the  
367 cryoprotectant before exposing them to the eggs. The limited fertilization we observed also  
368 emphasized the need to process sperm in concentrations that were relevant to those used for  
369 breeding. This prompted the design of a custom 3-D printed collection chamber to improve  
370 sperm collection, and enabled evaluation of cryopreservation conditions that resulted in  
371 effective post-thaw fertilization rates. This improved collection method provides expanded  
372 opportunities for standardized evaluation of cryoprotectants and concentrations, while bearing  
373 in mind that such choices should be governed by overall utility at the process level rather than  
374 optimizing singular factors (e.g., motility) at the individual step level. For example, a certain  
375 cryoprotectant may yield a slightly lower motility value than other chemicals, but is cheaper,  
376 less toxic to sperm cells, and allows more flexibility in timing and cooling rates. In research-  
377 driven studies, the highest motility would be recommended; in application-driven work, the  
378 cryoprotectant that increases efficiency and reliability would be recommended.

379           Other benefits of placing a focus on application include that work in the present study  
380 can be directly scaled up for use with hundreds of animals and multiple laboratories. Work  
381 addressing repository development in previous studies, with blue catfish for example, can be  
382 generalized to *Hydractinia* because the approaches used are the same, including the use of  
383 French straws that can be filled, sealed, and labelled using automated equipment (e.g., the  
384 Minitube Quattro system at the AGGRC can process 15,000 straws per hour). In addition,  
385 cryopreservation in *Hydractinia* can be directly transferred from a central facility (such as the  
386 AGGRC) to on-site work within an existing laboratory by use of high-throughput mobile  
387 cryopreservation capabilities [21], or by establishment of full high-throughput cryopreservation  
388 capabilities such as in creation of a central *Hydractinia* Stock Center (for economic analysis, see  
389 [22]). Development of in-house cryopreservation capabilities within research laboratories will  
390 be greatly strengthened by the recent developments in 3-D printing described above (e.g., [23])  
391 including fabrication of probes for monitoring and storing temperature information [24], and  
392 the potential for sharing of open-source design files for production of inexpensive, reproducible  
393 freezing devices that can be integrated with strong quality control programs (e.g., [25,26]).

## 394 **Identifying suitable freezing conditions**

395           While there are no other *Hydractinia* cryopreservation protocols to directly compare  
396 our results to, there are protocols that have been developed for sperm from various coral  
397 species which can serve as an indirect comparison for some of the key parameters. One  
398 protocol in particular has been instrumental in banking the germplasm of 31 coral species from  
399 around the world [6,27,28] and additional protocols have been developed in two coral species

400 [29,30]. Briefly, we can compare our method with the cryoprotectant, container, and cooling  
401 methods of these studies. Similar to two of the studies [28,30], DMSO was used as the  
402 cryoprotectant but at higher final concentrations ( $\geq 10\%$ ), and in the other [29] 20% methanol  
403 was used with 0.9 M sucrose as an extender. These cryoprotectant concentrations are higher  
404 than what our trials suggested would be suitable for *Hydractinia* sperm, however there are two  
405 major differences that may explain this discrepancy and proffer improvements to this study.  
406 The *in vitro* fertilization in this study used a volumetric sperm to egg ratio of 50  $\mu\text{L}$  with  
407  $\sim 10^5/\text{mL}$  sperm to 30-40 eggs, which was considerably more dilute in comparison to each coral  
408 study in which the ratios used to determine post-cryoprotectant fertility were 5  $\mu\text{L}$  with  $10^6/\text{mL}$   
409 sperm to 30-50 eggs [28], 1  $\mu\text{L}$  with  $10^5/\text{mL}$  sperm to 20 eggs [29], or 4  $\mu\text{L}$  with  $1.5 \times 10^7/\text{mL}$   
410 sperm to 50 eggs [30]. In future acute toxicity assays, optimizing the volumetric sperm to egg  
411 ratio (in our case, reducing the volume and increasing the sperm concentration) would improve  
412 the assessment of acute toxicity before moving onto freezing. Previous studies with eastern  
413 oyster *Crassostrea gigas* have shown that much of the variation in sperm cryopreservation  
414 response is procedural rather than biological (e.g., “male-to-male variation”), and control of  
415 sperm concentration is necessary for reproducible results [31].

416 One of the coral protocols cryopreserved 1-mL samples in 2-mL cryovials [28], whereas  
417 the other two studies [29,30] cryopreserved samples in 0.25-mL French straws. French straws  
418 offer several advantages over traditional cryovials. French straws require less storage space and  
419 can be easily processed manually in the case of a few samples, or more efficiently in high-  
420 throughput with automated filling, labeling, and sealing for hundreds to thousands of samples.  
421 In addition, samples can generally be cooled in French straws at a faster rate than in cryovials,

422 in large part due to the higher surface-area-to-volume ratio of straws (which can also decrease  
423 variability during freezing). In cryovials, there is potentially more variation across the sample  
424 volume as material on the periphery could freeze more rapidly than that closer to the center.  
425 Also, vials typically have thicker walls with greater insulative potential slowing heat removal  
426 from the sample.

427         With regard to cooling rates, there are several differences which make these studies  
428 difficult to compare. First, the equilibration temperature and time used were slightly different  
429 [28,30] or not explicitly quantified [29]. Second, the ending temperatures used to calculate the  
430 freezing curve were different where one study used -80°C [28] but the other two used the  
431 coldest achievable temperature between -110°C and -130°C. Theoretically, the ending  
432 temperature should not affect the rate calculation if the freezing rate is constant, but unless the  
433 temperature is monitored while the samples are being frozen, fluctuations are difficult to  
434 account for. Although the different procedures make studies difficult to compare, it is critical  
435 that all details surrounding the freezing process be documented for quality samples and  
436 reproducible results [11]. For this reason, only two of the studies can be referenced for  
437 reproducibility and generally compared in relation to their cooling rate [28,30]. Both studies  
438 used an equilibration temperature between 24-29°C and equilibration time of 15 [30] or 20 min  
439 [28] where in this study the equilibration temperature was 4°C for 20 min. The selection of 4°C  
440 as the equilibration temperature in our study was in part due to the usage of a controlled-rate  
441 freezer.

442         One obvious difference among the present study and the three published coral studies  
443 is that each used suspension at defined heights above liquid nitrogen to freeze samples. This

444 method is difficult to standardize, and is less precise than using a controlled-rate freezer.  
445 However, it has significant advantages including affordability, availability, and portability. In  
446 future studies, a comparison of samples frozen at comparable nominal rates by various  
447 methods should be done to enable harmonization of results and reporting, providing multiple  
448 options for freezing that could be selected based on the needs of the user. Other factors that  
449 could be investigated in future work include whether offspring produced from cryopreserved  
450 sperm will mature into full adults and whether the male-to-female ratio is affected.

## 451 **Approaches to repository development for aquatic species**

452         Recent advances in consumer-level technology provide opportunities to custom-design  
453 open-source options for hardware and other tools necessary to assist repository development  
454 beyond that provided by adaptation of traditional livestock practices. Customizing the design  
455 of the 3-D printed collection chamber greatly increased the efficiency and success in identifying  
456 suitable freezing conditions. To collect a useful number of sperm, the standard collection  
457 method via Pasteur pipette or micropipette is labor intensive, and poses logistical problems in  
458 the case of multiple collectors. Given our previous approach, collecting all sperm would be  
459 possible but would require filtering all the water from the bin (~2 L) or having access to a large  
460 capacity centrifuge. Thus, by customizing a chamber to minimize the collection volume (<100  
461 mL) and maximize the total yield of sperm (as many as ten slides bearing *Hydractinia*), we were  
462 able to directly improve and standardize processing efficiency.

463         In addition, custom design of devices is also possible for freezing activities. The  
464 polylactic acid (PLA) used for 3-D printing does not become brittle or stiff as do other plastics

465 when exposed to cryogenic temperatures (such as liquid nitrogen) [32] making 3-D printed  
466 objects safe and useful for such applications. Various devices can typically be fabricated at low  
467 cost (e.g., \$10 or less for material costs) using consumer-level printers (\$250 or less) that offer  
468 high resolution, flexibility, and short learning curves. There are large internet-driven user  
469 communities for these printers and thousands of videos (such as on YouTube) are available for  
470 printer set up, training, and troubleshooting. In addition, design files can be shared on a  
471 number of sites (e.g., Thingiverse, and Github) for others to print and customize. In this way,  
472 devices used in cryopreservation and repository development can be developed, shared, and  
473 standardized within research communities, greatly reducing costs of cryopreservation, and  
474 making reliable methods widely available. Systems such as this must be accompanied by quality  
475 control and quality assurance programs, however, to ensure that samples meet minimum  
476 thresholds for repository use [25,26].)

477 Overall, the success in the present study of using a generalizable approach for  
478 *Hydractinia* sperm provides further evidence that cryopreservation protocols are not  
479 necessarily species-specific. For example, a single generalized protocol was applied to more  
480 than 20 species within the genus *Xiphophorus* and two other species in the genus *Poecilia* to  
481 enable repository development to safeguard the genetic resources of these valuable biomedical  
482 model species [12]. Overall, more research is needed for aquatic species in general to  
483 quantitatively assess factors important to practical repository operation with cryopreserved  
484 sperm (e.g., [14]), and standardization of procedures and reporting is necessary to enable  
485 meaningful comparisons across studies [11]. The present study offers evidence that substantial  
486 repository-level benefits can be realized by generalizing cryopreservation at the application



487 level, rather than trying to optimize new protocols on a species-by-species basis, and restricting  
488 this work to the traditional (reductionist) research level [11].

## 489 **Conclusions**

490 This feasibility study showed that it is possible and a worthwhile endeavor to pursue  
491 *Hydractinia* sperm cryopreservation as a long-term storage option for genetic resources.  
492 Specifically, we demonstrated that sperm cooled at 20°C per min in 5% DMSO at a  
493 concentration of  $10^8$ - $10^9$ /ml in 0.25-mL French straws were able to fertilize 150-300 eggs, which  
494 developed into juvenile colonies. In our experience, a population of 150 juvenile colonies  
495 typically contains sufficient numbers to establish a strain for propagation via asexual  
496 reproduction (i.e., they will grow into healthy adults with the genotype of interest) or breeding  
497 to produce subsequent generations. With some additional work it should be possible to reliably  
498 freeze and re-derive specific genotypes. This would greatly enhance the utility of *Hydractinia* as  
499 a model system for cnidarian genetics. In addition, we expect this work could also provide a  
500 guide to researchers seeking to develop cryopreservation approaches in other cnidarian  
501 species.

502 While this study has direct implications for the *Hydractinia* community, there are several  
503 considerations that can be discussed with regard to communities that work on other cnidarian  
504 models. Lack of long-term storage options has been one of the limitations to nearly all cnidarian  
505 research. Cryopreservation has not been pursued either due to the lack of resources to achieve  
506 and maintain frozen samples, or the lack of necessity as many cnidarian models can be cultured  
507 relatively simply and the animals can regenerate. A notable exception to this are

508 cryopreservation efforts for conservation in coral species and their symbionts due to  
509 importance of corals to reef biodiversity, and the overall decline in health and prevalence of  
510 corals globally over the past several decades [33–36].

511 Another emerging problem for popular research models is the rapid proliferation of new  
512 lines and mutants that would require maintenance as live animals which is expensive and risky  
513 without cryopreservation. With these common limitations in mind, cnidarian communities need  
514 to come together and agree on a consistent and foundational approach towards  
515 cryopreservation of all cnidarian models for the ultimate purpose of repository development  
516 and establishment of repository networks. By having this long-term goal in mind, we can more  
517 systematically work towards developing, protecting, maintaining, distributing, and utilizing an  
518 expanding pool of cnidarian genetic resources.

519 A centralized repository or stock center is a necessity for well-developed research  
520 organisms and part of the success with these has been due to collaboration among laboratories  
521 and the sharing of tools, systems, and resources throughout the communities. For example,  
522 mouse resources are largely centralized with The Jackson Laboratory (<https://www.jax.org/>),  
523 zebrafish databases and lines are found in the Zebrafish International Resources Center (ZIRC,  
524 University of Oregon), *Drosophila* utilizes the Bloomington *Drosophila* Stock Center (BDSC,  
525 Indiana University Bloomington), *Caenorhabditis elegans* and other worm-related models  
526 localize their resources in WormBase ([wormbase.org/](http://wormbase.org/)), and *Xenopus* related resources are  
527 found in Xenbase (<https://www.xenbase.org>). Having a wealth of such resources and  
528 information available to these communities makes these model systems much more useful and

529 available to investigators, whereas model systems that require development of basic tools can  
530 be more challenging on many levels.

531 Future studies should establish a standardized approach for the storage, shipment, and  
532 use of frozen *Hydractinia* samples that can be made available throughout the research  
533 community. Current models for this would include development of repositories or a repository  
534 system, and the potential incorporation of these entities into a community-based stock center.  
535 An existing model for such organization exists in ZIRC which maintains more than 43,000  
536 research lines of zebrafish as frozen sperm (<https://zebrafish.org/>). In addition, to assist  
537 standardization of protocols and approaches, it may be useful to establish community-level  
538 mechanisms to design and share inexpensive devices that can be used to support users across a  
539 wide range of experience and skill levels in culture, spawning, and cryopreservation of  
540 *Hydractinia*. Lastly, cryopreservation and repository development should be expanded to  
541 include additional germplasm and somatic cell types.

542

## 543 **Acknowledgements**

544           We thank Mallory Lemoine, William Childress, Amy Guitreau, Liu Yue, Teresa Gutierrez-

545 Wing of the AGGRC for technical assistance and discussion.

546

## 547 **References**

- 548 1. Plickert G, Frank URI, Müller WA. Hydractinia , a pioneering model for stem cell biology  
549 and reprogramming somatic cells to pluripotency. *Int J Dev Biol.* 2012;56:519–34.
- 550 2. Gahan JM, Bradshaw B, Flici H, Frank U. The interstitial stem cells in Hydractinia and their  
551 role in regeneration. *Curr Opin Genet Dev.* 2016;40:65–73.
- 552 3. Nicotra ML. Invertebrate allorecognition. *Curr Biol.* 2019;29(11):R463–7.
- 553 4. Bradshaw B, Thompson K, Frank U. Distinct mechanisms underlie oral vs aboral  
554 regeneration in the cnidarian Hydractinia echinata. 2015;1–19.
- 555 5. Sanders SM, Ma Z, Hughes JM, Riscoe BM, Gibson GA, Watson AM, et al. CRISPR/Cas9-  
556 mediated gene knockin in the hydroid Hydractinia symbiolongicarpus. *BMC Genomics.*  
557 2018;19(1):1–17.
- 558 6. Hagedorn M, Oppen MJH Van, Carter V, Henley M, Abrego D, Puill-stephan E, et al. First  
559 frozen repository for the Great Barrier Reef coral created. *Cryobiology.* 2012;65(2):157–  
560 8.
- 561 7. Mali B, Millane RC, Plickert G, Frohme M, Frank U. A polymorphic, thrombospondin  
562 domain-containing lectin is an oocyte marker in Hydractinia: implications for germ cell  
563 specification and sex determination. *Int J Dev Biol.* 2011;55:103–8.
- 564 8. Kraus Y, Flici H, Hensel K, Plickert G, Leitz T, Frank U. The embryonic development of the  
565 cnidarian Hydractinia echinata. *Evol Dev.* 2014;338:323–38.
- 566 9. Weis VM, Keene DR, Buss LEOW. *Biology of hydractiniid hydroids.* 4. ultrastructure the

- 567 planula of hydractinia echinata. Biol Bull. 1985;168:403–18.
- 568 10. Tiersch TR. Process pathways for cryopreservation research, application and  
569 commercialization. In: Tiersch TR, Green CC, editors. Cryopreservation in Aquatic Species.  
570 2nd ed. Baton Rouge, Louisiana: World Aquaculture Society; 2011. p. 646–71.
- 571 11. Torres L, Tiersch TR. Addressing Reproducibility in Cryopreservation , and Considerations  
572 Necessary for Commercialization and Community Development in Support of Genetic  
573 Resources of Aquatic Species. J World Aquac Soc. 2018;49(4):644–63.
- 574 12. Liu Y, Torres L, Tiersch TR, Rouge B. Quality evaluation of sperm from livebearing fishes:  
575 standardized assessment of sperm bundles (spermatozeugmata) from *Xenotoca eiseni*  
576 (*Goodeidae*). Theriogenology. 2018;107:50–6.
- 577 13. Liu Y, Yang H, Torres L, Tiersch TR. Activation of free sperm and dissociation of sperm  
578 bundles (spermatozeugmata) of an endangered viviparous Fish, *Xenotoca eiseni*. Comp  
579 Biochem Physiol A Mol Integr Physiol. 2018;218:38–45.
- 580 14. Hu E, Bosworth B, Baxter J, Tiersch TR. On-site evaluation of commercial-scale hybrid  
581 catfish production using cryopreserved blue catfish sperm. Aquaculture. 2014;426–  
582 427:88–95.
- 583 15. Hu E, Liao TW, Tiersch TR. Simulation modeling of high-throughput cryopreservation of  
584 aquatic germplasm: a case study of blue catfish sperm processing. Aquac Res.  
585 2015;46(2):432–45.
- 586 16. Hu E, Yang H, Tiersch TR. High-throughput cryopreservation of spermatozoa of blue

- 587 catfish (*Ictalurus furcatus*): establishment of an approach for commercial-scale  
588 processing. *Cryobiology*. 2011;62(1):74–82.
- 589 17. Lang RP, Riley KL, Chandler JE, Tiersch TR. The Use of Dairy Protocols for Sperm  
590 Cryopreservation of Blue Catfish *Ictalurus furcatus*. *J World Aquac Soc*. 2003;34(1).
- 591 18. Paniagua-chavez CG, Buchanan JT, Supan JE, Tiersch TR. Cryopreservation of Sperm and  
592 Larvae of the Eastern Oyster. *Cryopreserv Aquat Species*. 2000;230–9.
- 593 19. Tiersch TR. Process Pathways for Cryopreservation Research, Application and  
594 Commercialization. 2011;646–71.
- 595 20. Yang H, Hu E, Buchanan JT, Tiersch TR. A Strategy for Sperm Cryopreservation of Atlantic  
596 Salmon , *Salmo salar*, for Remote Commercial-scale High-throughput Processing. *J World*  
597 *Aquac Soc*. 2018;49(1):96–112.
- 598 21. Childress WM, Caffey RH, Tiersch TR. Design and Cost Analysis of a Self-contained Mobile  
599 Laboratory for Commercial-scale Aquatic Species Cryopreservation. 2018;49(5):805–26.
- 600 22. Gwo J. Cryopreservation of aquatic invertebrate semen : A review Cryopreservation of  
601 aquatic invertebrate semen : a review. 2018;(March 2000).
- 602 23. Hu E, Childress W, Tiersch TR. 3-D printing provides a novel approach for standardization  
603 and reproducibility of freezing devices. *Cryobiology*. 2017;76:34–40.
- 604 24. Shamkhalichenar H, Choi J, Tiersch TR. Three-dimensional printing can provide  
605 customizable probes for sensing and monitoring in cryobiology applications. *Cryobiology*.  
606 2019;88:64–9.

- 607 25. Hu E, Liao TW, Tiersch TR. A quality assurance initiative for commercial-scale production  
608 in high-throughput cryopreservation of blue catfish sperm. *Cryobiology*. 2013;67:214–24.
- 609 26. Leticia Torres, Hu E, Tiersch TR. Cryopreservation in fish: current status and pathways to  
610 quality assurance and quality control in repository development. *Reprod Fertil Dev*.  
611 2016;28:1105–15.
- 612 27. Hagedorn M, Spindler R, Daly J. Cryopreservation as a Tool for Reef Restoration: 2019. In:  
613 Comizzoli P, Brown JL, Holt W V, editors. *Reproductive Sciences in Animal Conservation*.  
614 Cham: Springer International Publishing; 2019. p. 489–505.
- 615 28. Hagedorn M, Carter V, Martorana K, Paresa MK, Acker J, Baums IB, et al. Preserving and  
616 Using Germplasm and Dissociated Embryonic Cells for Conserving Caribbean and Pacific  
617 Coral. *PLoS One*. 2012;7(3).
- 618 29. Ohki S, Morita M, Kitanobo S, Kowalska AA, Kajetan RK. Cryopreservation of *Acropora*  
619 *digitifera* sperm with use of sucrose and methanol based solution. *Cryobiology*.  
620 2014;69(1):134–9.
- 621 30. Viyakarn V, Chavanich S, Chong G, Tsai S, Lin C. Cryopreservation of sperm from the coral  
622 *Acropora humilis*. *Cryobiology*. 2018;80:130–8.
- 623 31. Dong Q, Huang C, Tiersch TR. Control of sperm concentration is necessary for  
624 standardization of sperm cryopreservation in aquatic species : Evidence from sperm  
625 agglutination in oysters. *Cryobiology*. 2007;54:87–98.
- 626 32. Tiersch TR, Monroe WT. Three-dimensional printing with polylactic acid (PLA)



- 627 thermoplastic offers new opportunities for cryobiology Terrence. *Cryobiology*.  
628 2016;73(3):396–8.
- 629 33. Hoegh-Guldberg O, Jacob D, Taylor M, Guillen Bolanos T, Bindi M, Brown S, et al. The  
630 human imperative of stabilizing global climate change at 1.5°C. *Science* (80- ).  
631 2019;365(6459).
- 632 34. Hoegh-Guldberg O, Eakin CM, Hodgson G, Sale PF, Veron JEN. Consensus Statement on  
633 Coral Bleaching Climate Change. *Int Coral Reef Soc*. 2018;14–7.
- 634 35. Palumbi SR, Anthony KRN, Baker AC, Baskett ML, Bhattacharya D, Bourne DG, et al. A  
635 Research Review of Interventions to Increase the Persistence and Resilience of Coral  
636 Reefs. In: *A Research Review of Interventions to Increase the Persistence and Resilience*  
637 *of Coral Reefs*. Washington, DC: The National Academies Press; 2019.
- 638 36. Weis VM. Cell Biology of Coral Symbiosis: Foundational Study Can Inform Solutions to the  
639 Coral Reef Crisis. *Integr Comp Biol*. 2019;1–11.
- 640

## 641 **Supporting Information Captions**

642 **Figure S1. Pedigree of the colonies used to generate germplasm and offspring.** Field-collected  
643 colonies are denoted with black symbols. Colony 291-10 is the offspring of two colonies  
644 collected from Lighthouse Point, New Haven, CT in 2014. Colony 295-8 is the offspring of a field  
645 collected colony and a laboratory strain, 235-33. The pedigree of colony 235-33 can be  
646 recreated by concatenating previously published pedigrees (shaded area) (Cadavid et al. 2004;  
647 Powell et al. 2007). Colony AP100-88 is from the mapping population in Powell et al. (2007).  
648 Colony 431-44 is from the mapping population in Cadavid et al. (2004).

649

### 650 **Figure S2. Experiment 1 cooling curve (5°C/min).**

651 The first trial included a slow cooling rate of 5°C/min with a sperm concentration of  $1 \times 10^7$ /mL.  
652 The green line represents the programmed temperature profile, red is the chamber  
653 temperature, and blue is the sample temperature. Samples were held at -80°C for at least 5 min  
654 before plunging into liquid nitrogen.

655

### 656 **Figure S3. Experiment 1 cooling curve (30°C/min).**

657 The first trial included a fast freezing rate of 30°C/min with a sperm concentration of  $1 \times 10^7$ /mL.  
658 The green line represents the programmed temperature profile, red is the chamber  
659 temperature, and blue is the sample temperature. Samples were held at -80°C for at least 5  
660 minutes before plunging into liquid nitrogen.

661

662 **Figure S4. Experiment 2 cooling curve (20°C/min).** The second trial adjusted the freezing rate  
663 to a moderate rate of 20°C/min with a more concentrated sperm sample ( $5 \times 10^7$ /mL). The green  
664 line represents the programmed temperature profile, red is the chamber temperature, and  
665 blue is the sample temperature. Samples were held at -80°C for at least 5 minutes before  
666 plunging into liquid nitrogen.

667

668 **Figure S5. Cooling curve of various sperm concentrations at (20°C/min).** Each sperm  
669 concentration ( $10^7$ - $10^9$ /mL) was frozen at the same time at 20°C/min. The green line represents  
670 the programmed temperature profile, red is the chamber temperature, and blue is the sample  
671 temperature. Samples were held at -80°C for at least 5 min before plunging into liquid nitrogen.

672

673 **Table S1. Slicer software settings used to 3-D print collection chamber.**

674

675 **Table S2. Printer hardware features.**

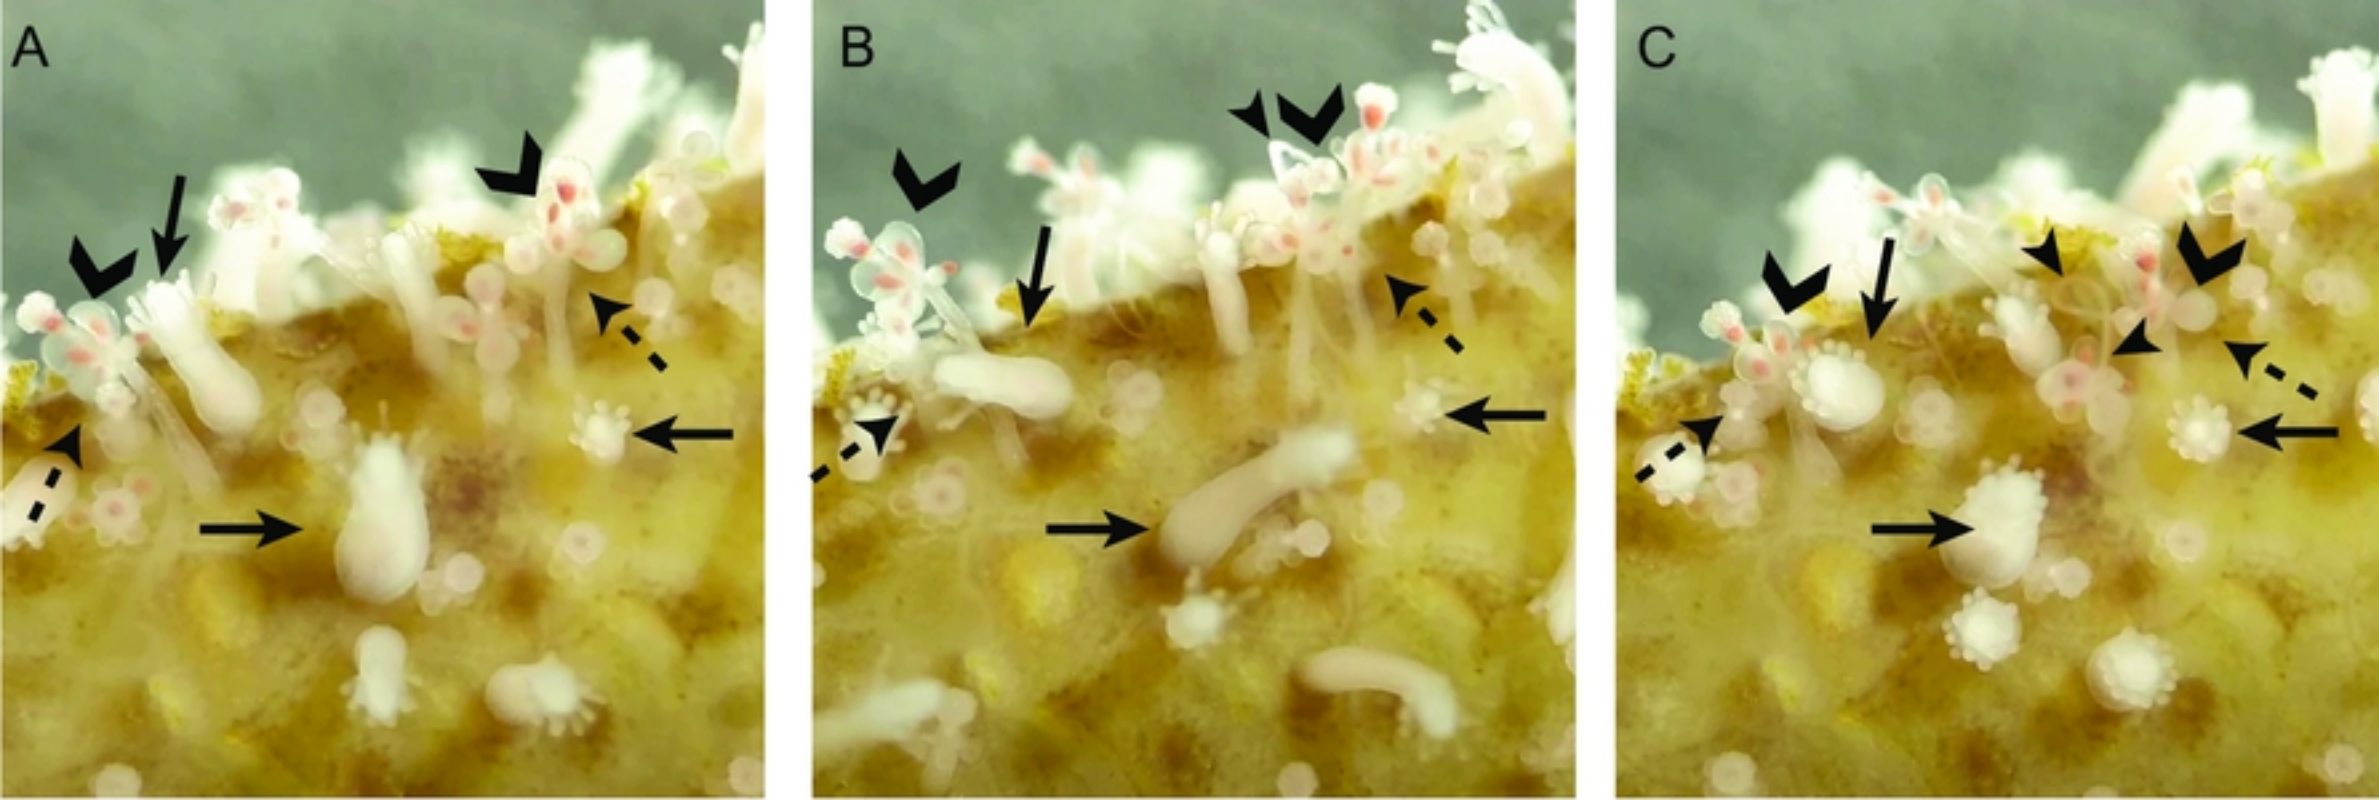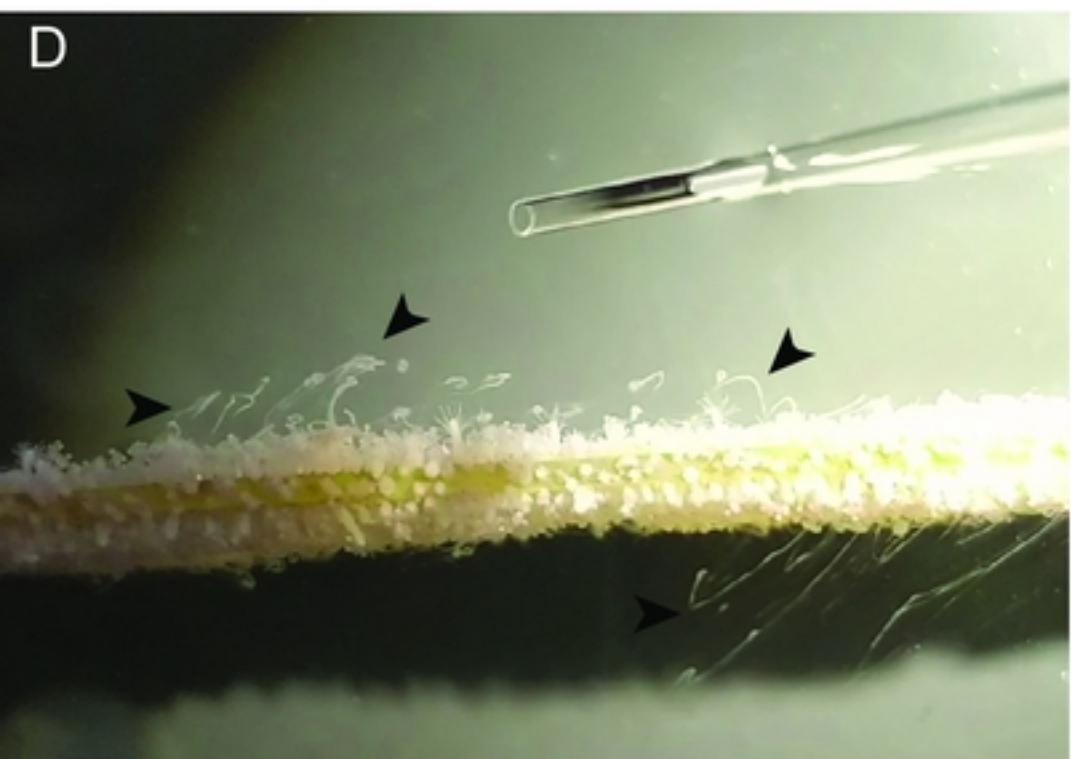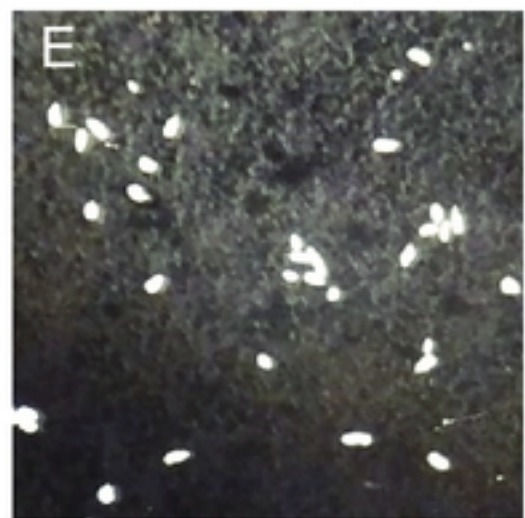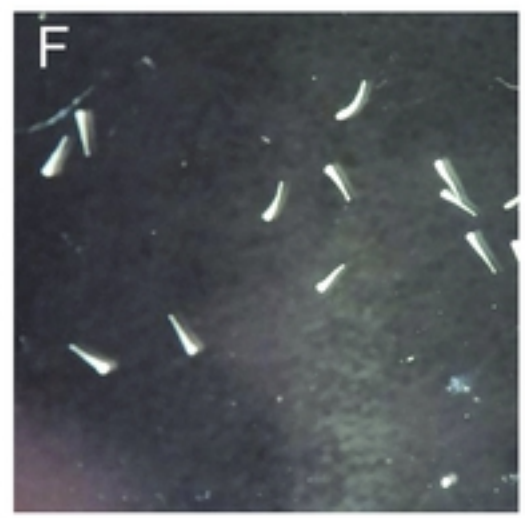

Key

|       |              |   |              |
|-------|--------------|---|--------------|
| →     | Gastrozooids | ➤ | Gonophore    |
| - - ➤ | Gonozooids   | ➤ | Sperm stream |

Fig1

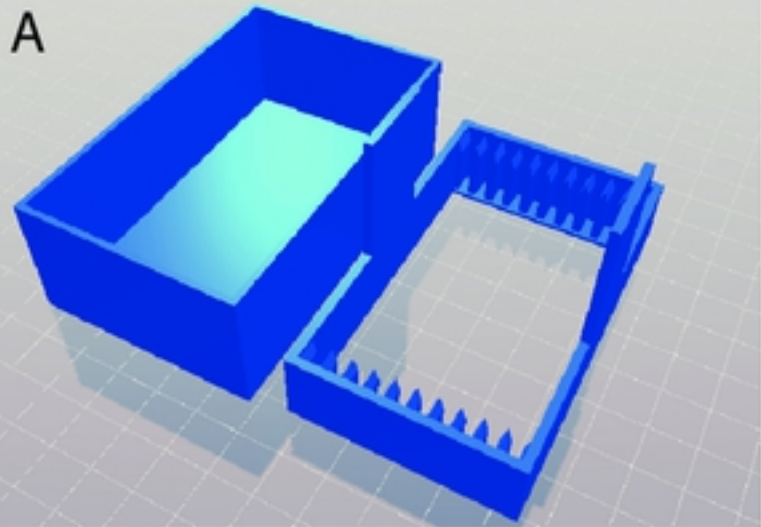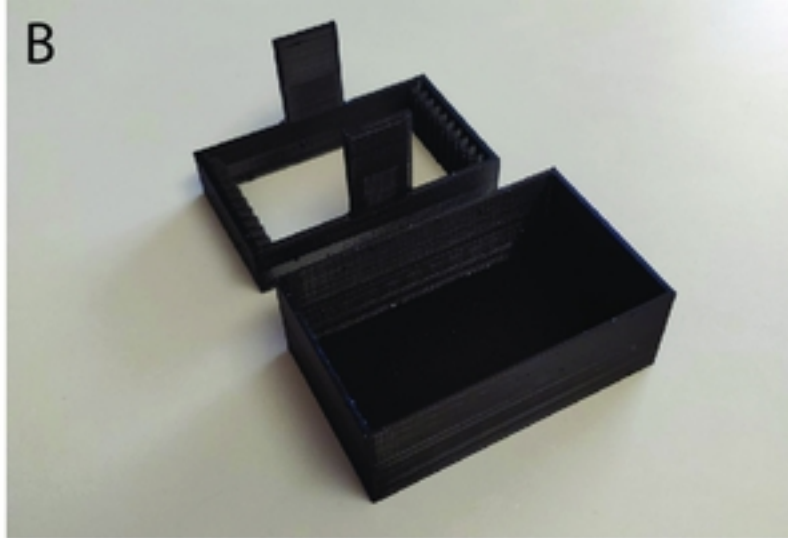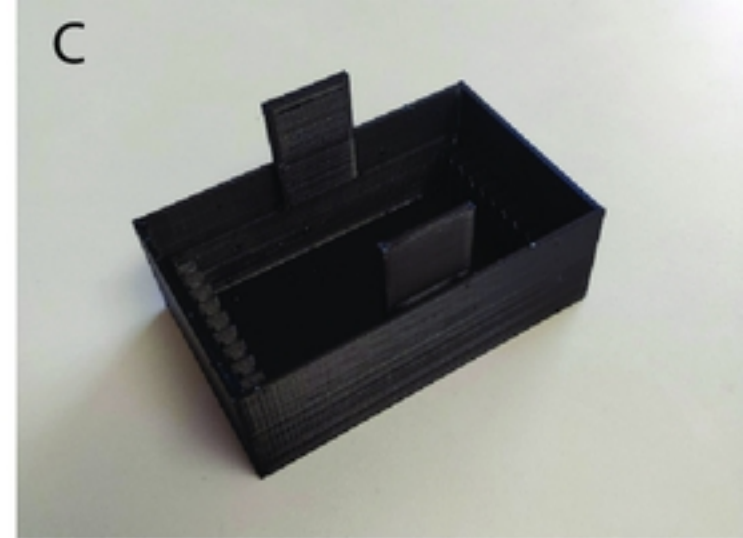

Fig2

**A**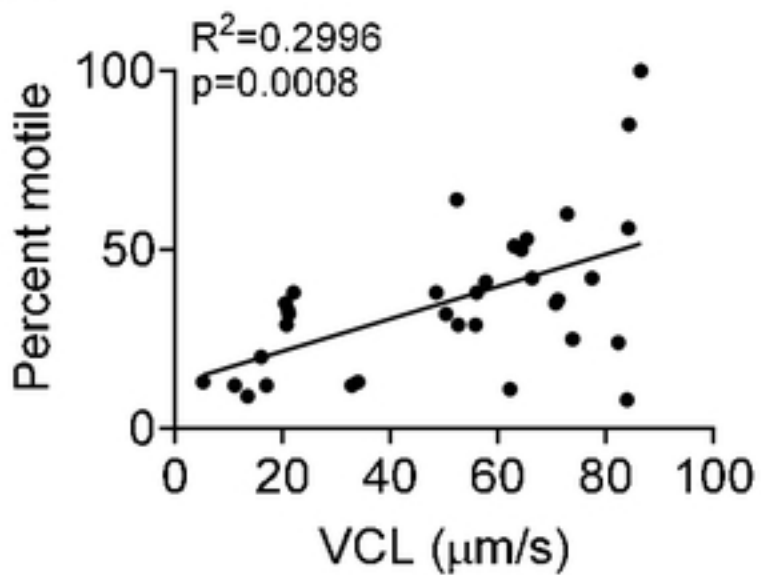**B**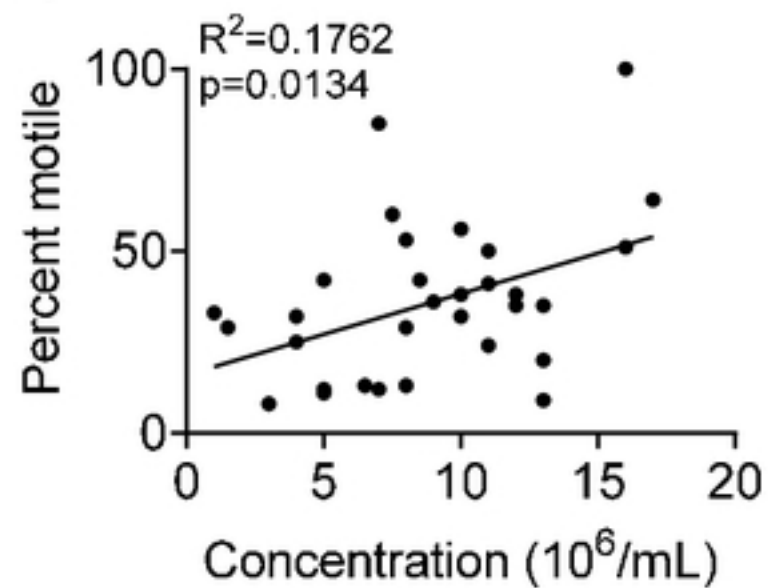**C**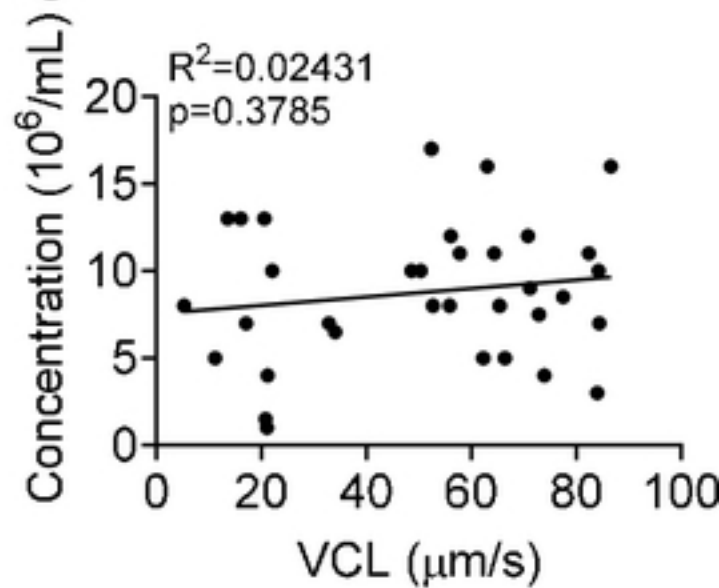**Fig3**

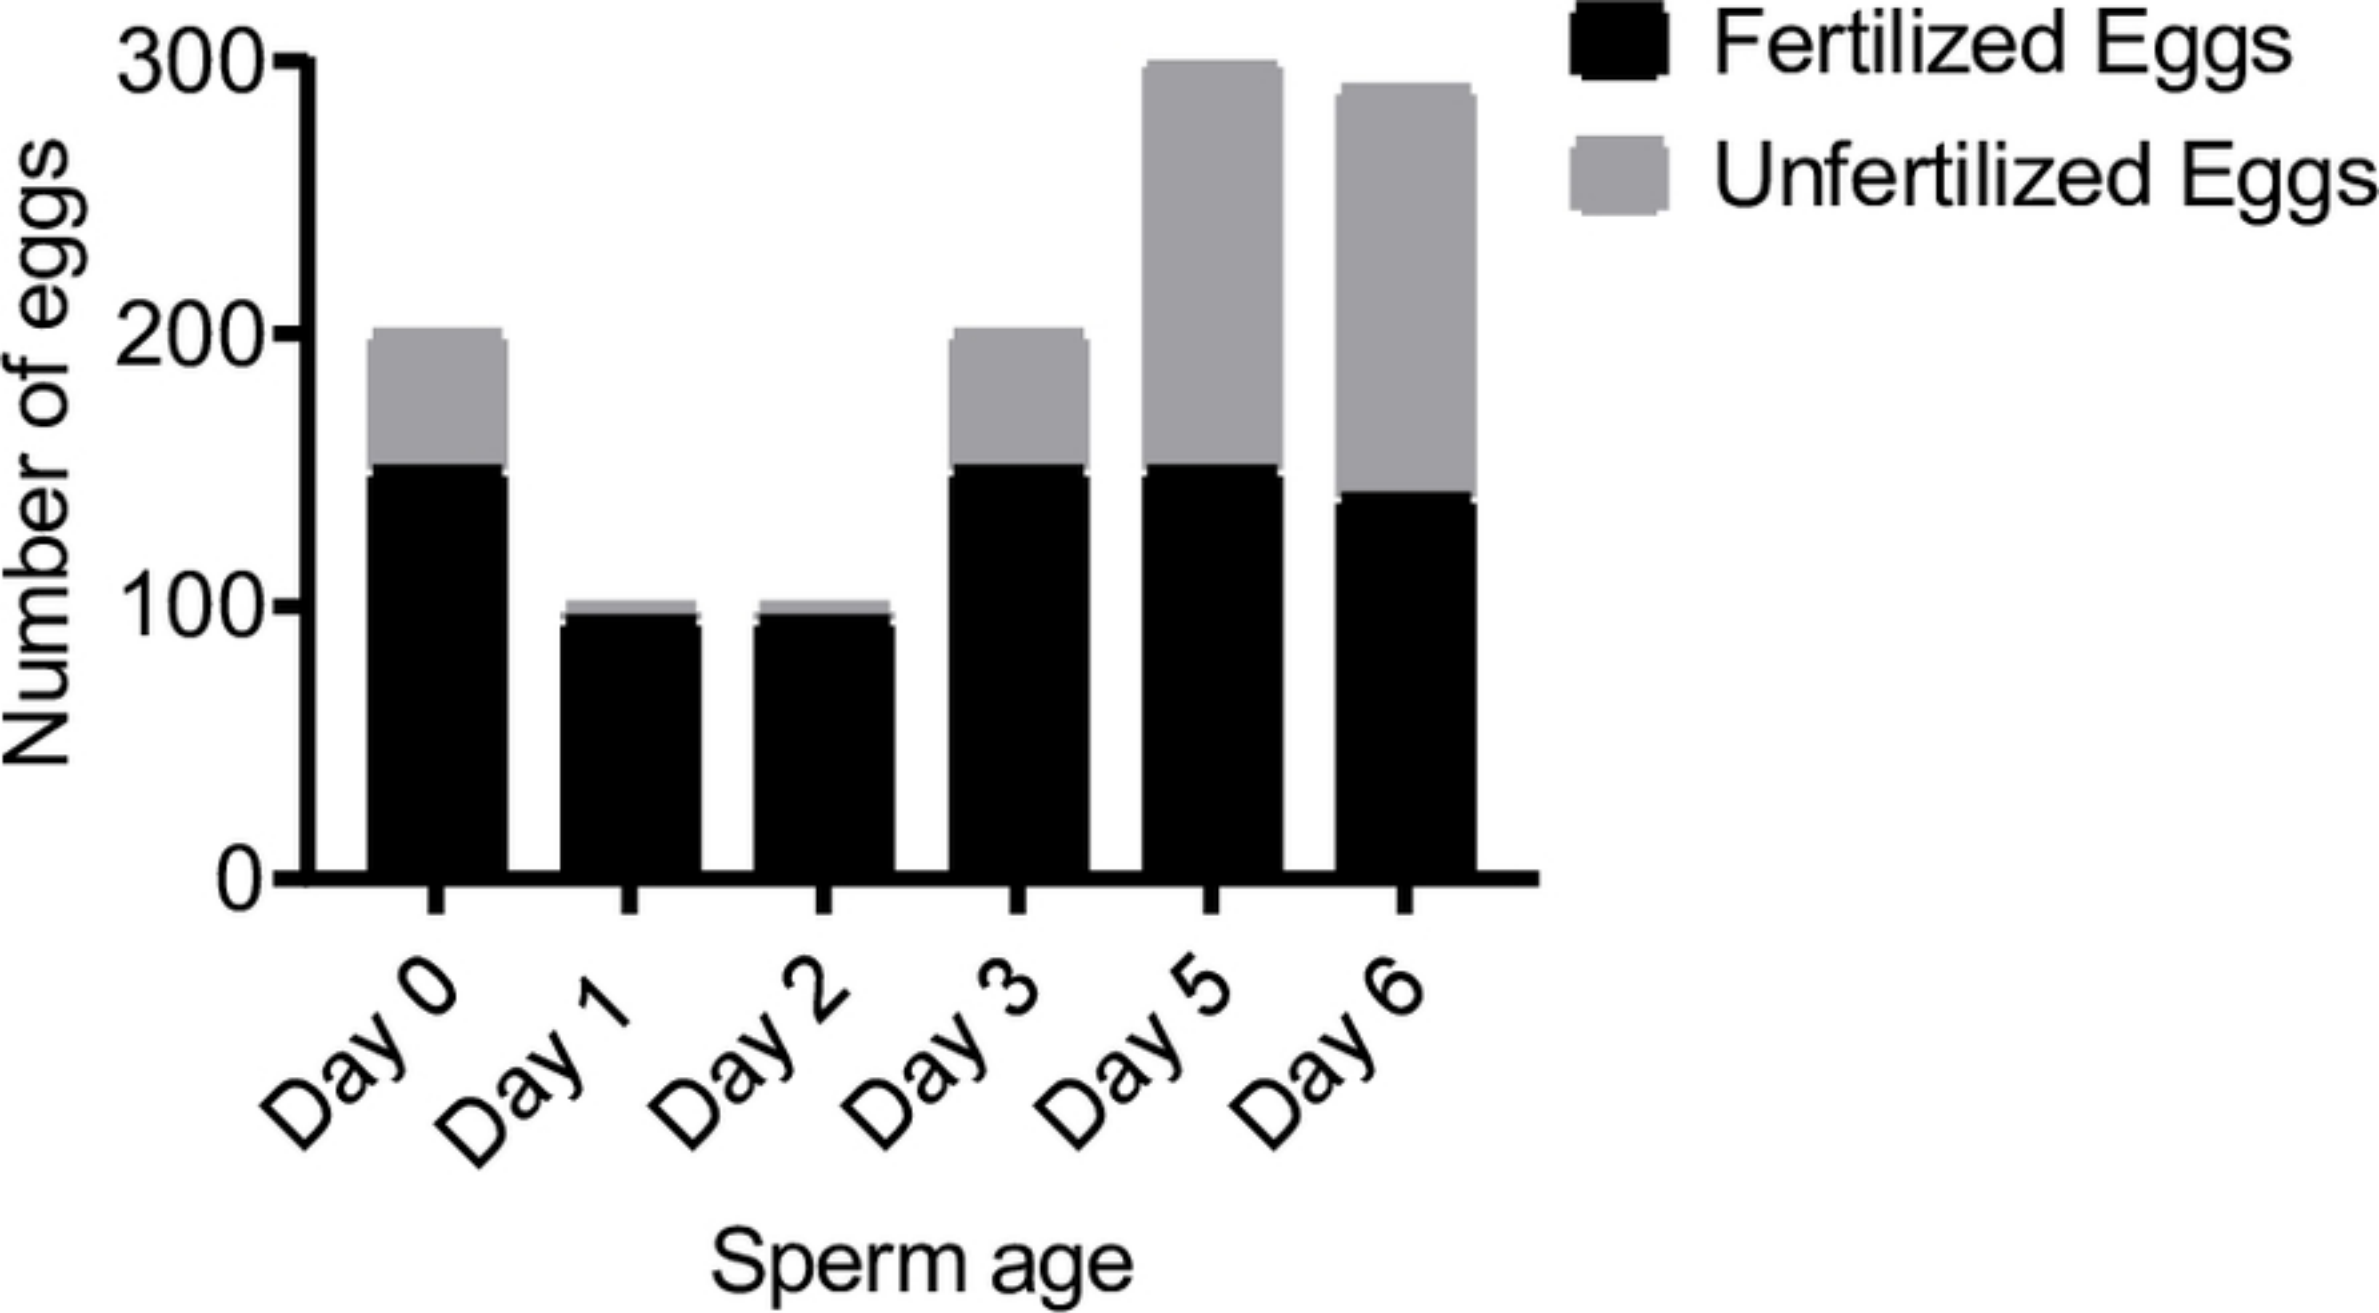

Fig4

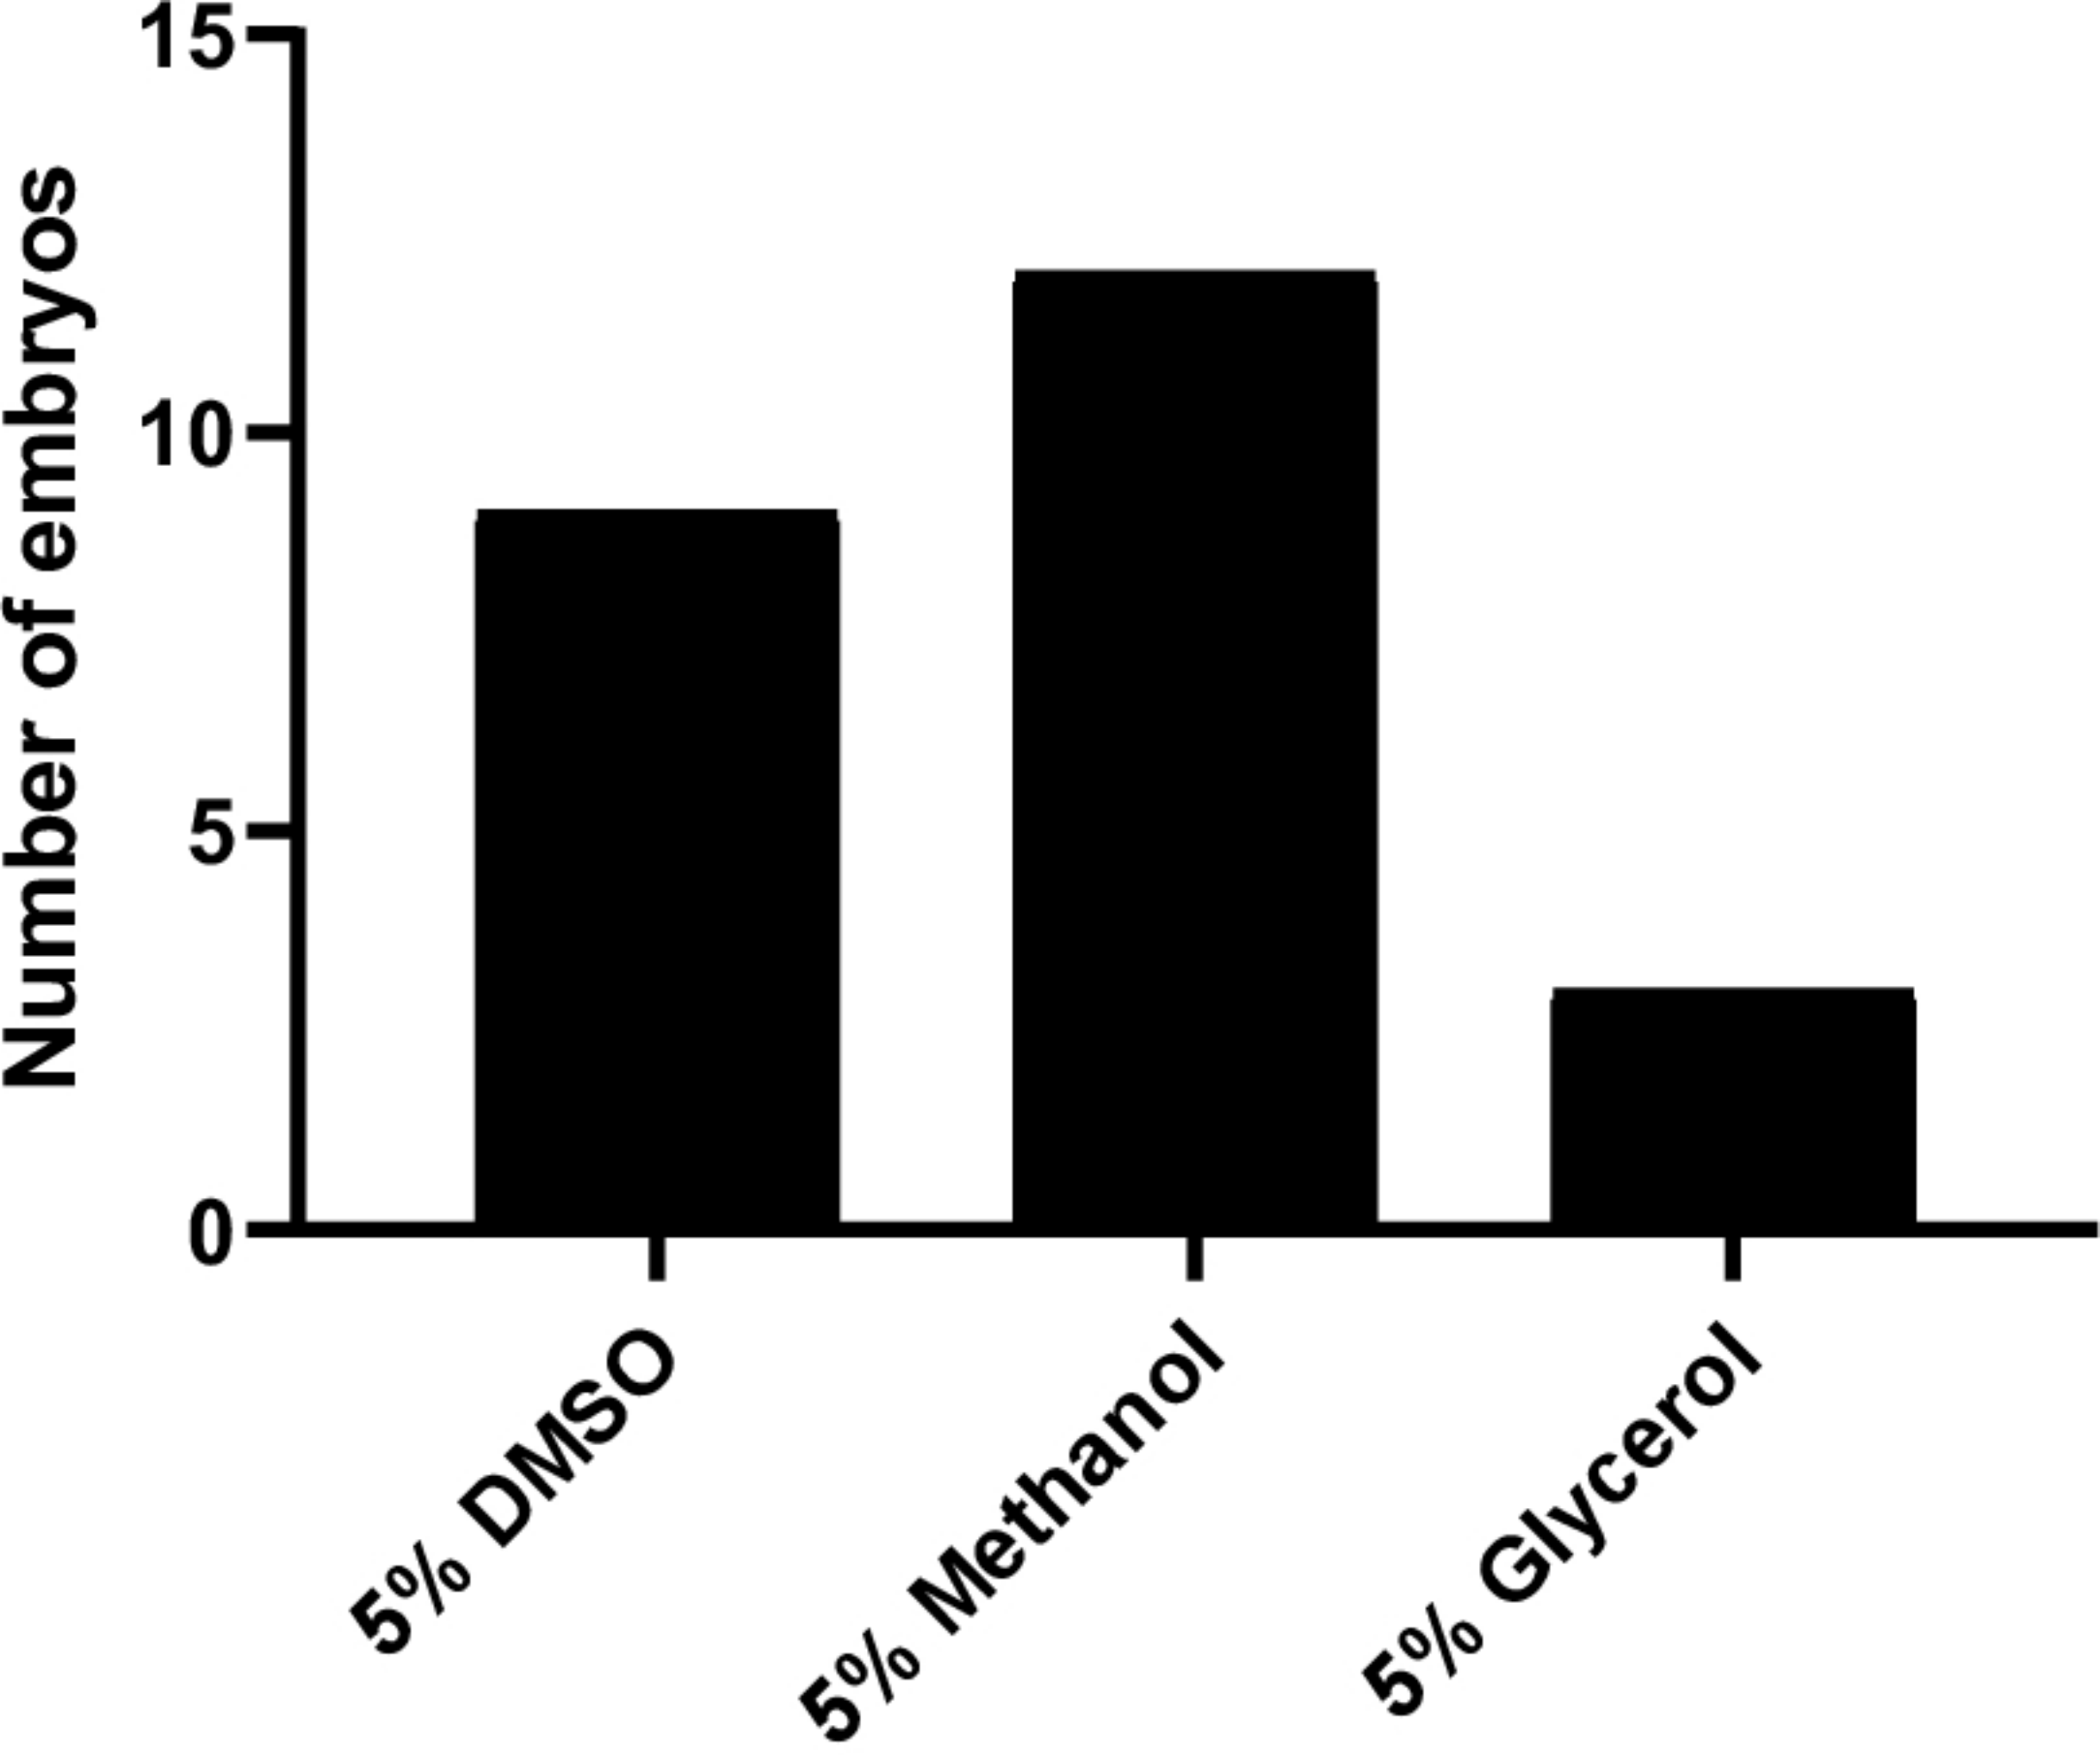

Fig5



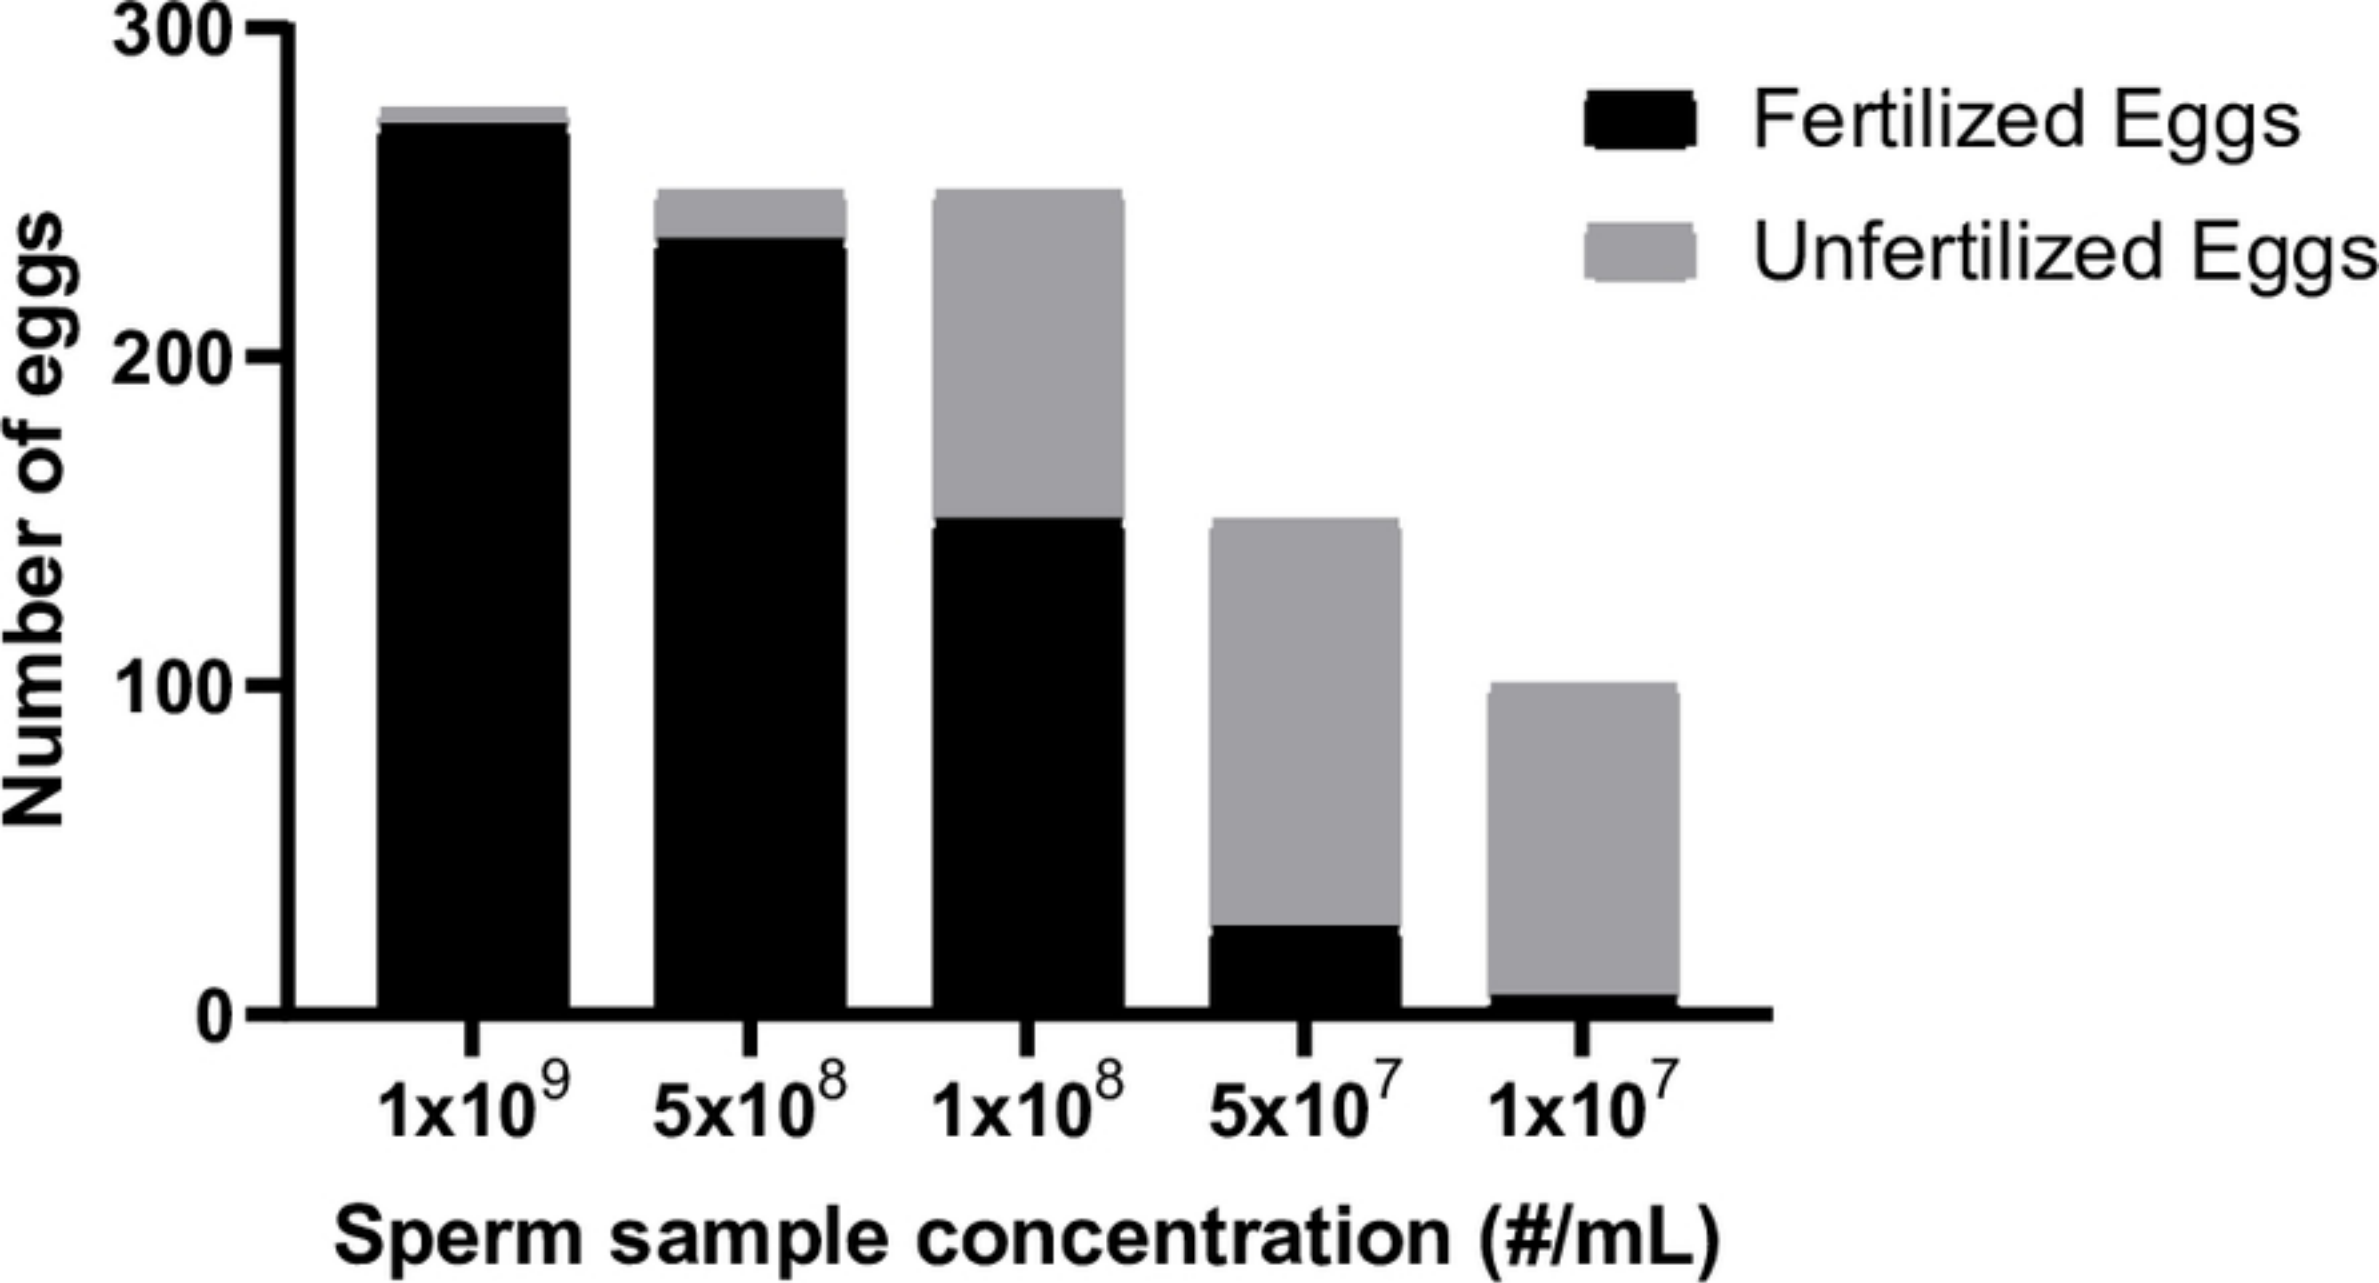

Fig6
